# Supplementary material
Source: PubMed Central journal article supplement (PMC5528604)
Supplement: MOL2-8-1729-s001.pdf [file MOL2-8-1729-s001.pdf]

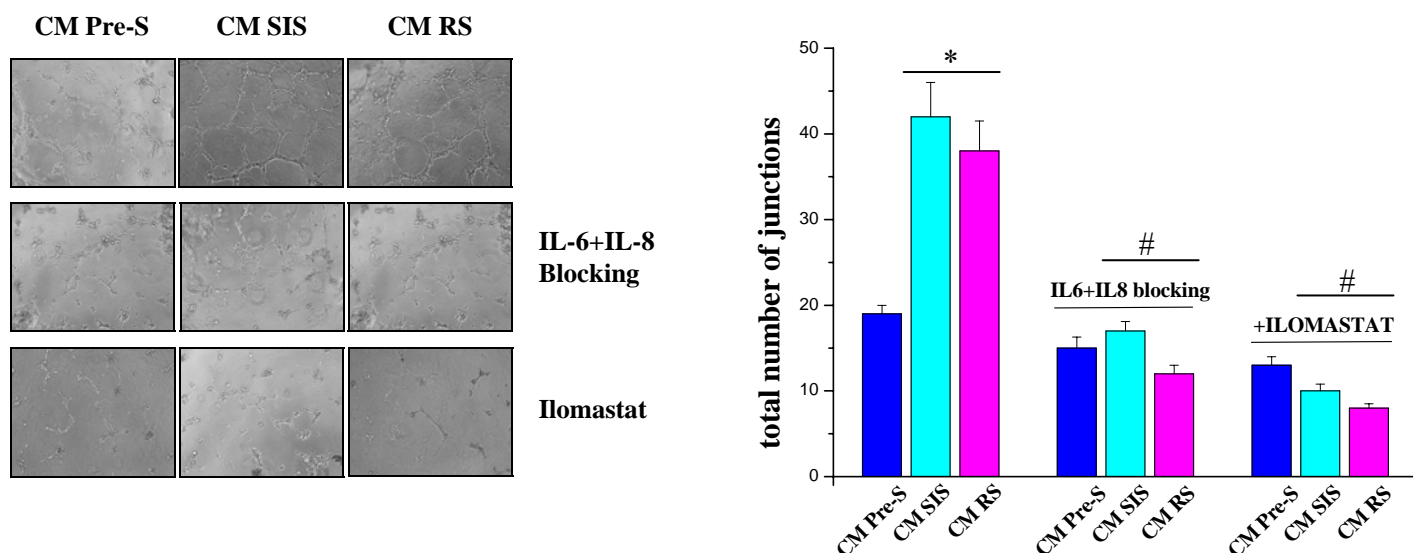

**Suppl Fig 1. IL6/IL8 blocking antibodies or Iiomastat treatment decrease Matrigel angiogenesis *in vitro*.** HUVECs were seeded on Matrigel coated multiwell with CM of pre-senescent or senescent cells in the presence of 0.8  $\mu\text{g/ml}$  IL-6 and 1  $\mu\text{g/ml}$  IL-8 blocking antibodies or 50  $\mu\text{M}$  Iiomastat for 6 h at 37°C. Cord formation was examined by phase-contrast microscopy. The total number of junctions for optical field is counted. Results are representative of three independent experiments. \* p<0.005 CM senescent cells vs CM pre-senescent cells; #p<0.005 treated senescent cells vs untreated senescent cells.
