# Supplementary material
Source: PubMed Central journal article supplement (PMC5528604)
Supplement: MOL2-8-1729-s002.pdf [file MOL2-8-1729-s002.pdf]

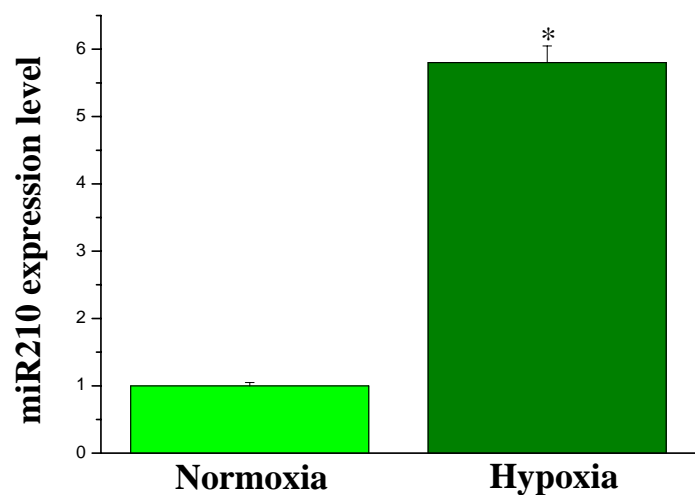

**Suppl Fig 2. *miR-210* expression level in HPFs.** Monolayers of HPFs were serum starved for 24 h and then incubated for additional 24 h in hypoxic condition (i.e., 1 % O<sub>2</sub>) or in normoxic condition. Total RNA was extracted and *miR-210* expression level was analyzed by qRT-PCR. Results are representative of three experiments with similar results. \* p<0.005 normoxia vs hypoxia.
