# Supplementary material
Source: PubMed Central journal article supplement (PMC5528604)
Supplement: MOL2-8-1729-s003.pdf [file MOL2-8-1729-s003.pdf]

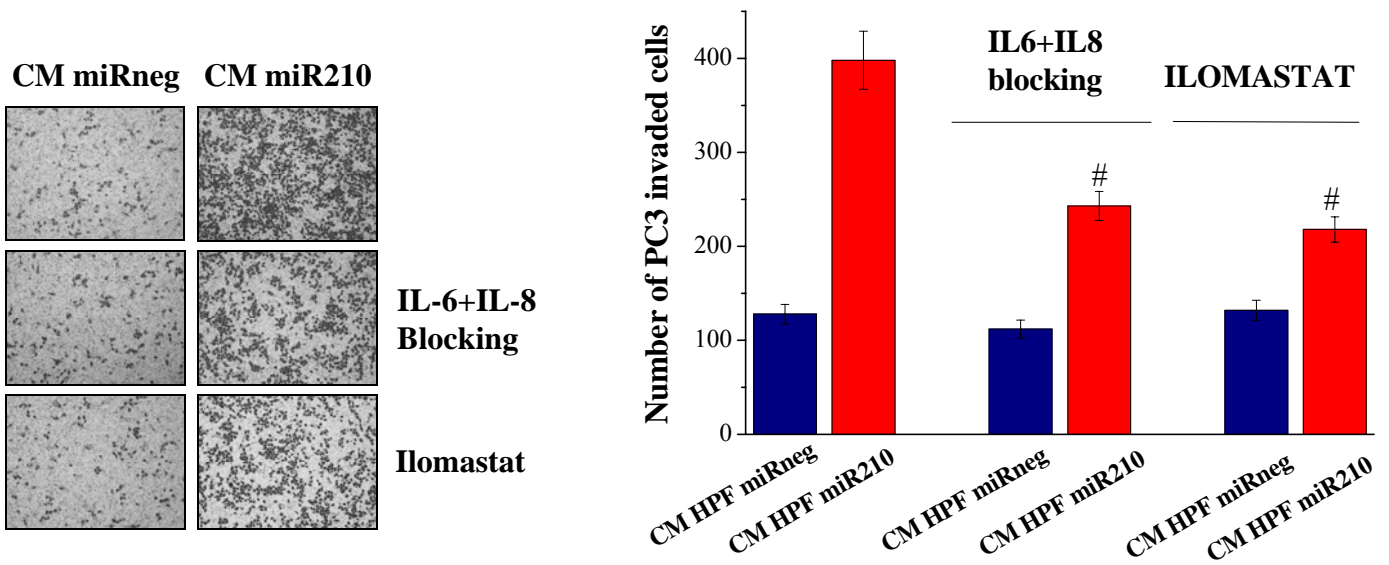

**Suppl Fig 3. IL6/IL8 blocking antibodies or Iiomastat treatment decrease PC3 invasiveness.** HPFs were transfected with *miR-210* or miRneg. After 24 h cells were serum starved for 48 h to prepare CM. PC3 cells were incubated with CM in the presence of 0.8  $\mu\text{g/ml}$  IL-6 and 1  $\mu\text{g/ml}$  IL-8 blocking antibodies or 50  $\mu\text{M}$  Iiomastat for 48 h. PC3 cells were then allowed to invade for 24 h through the filter coated with Matrigel toward the lower compartment filled with complete growth medium. Photographs are representative of four randomly chosen fields. \* $p < 0.005$  CM *miR-210* vs CM miRneg; #  $p \leq 0.001$  CM treated *miR-210* transfected cells vs CM untreated *miR-210* transfected cells.
